# Supplementary material for: Quantitative mitochondrial DNA copy number determination using droplet digital PCR with single-cell resolution
Source: Genome Res. 2019 Nov;29(11):1878–88. doi: 10.1101/gr.250480.119 (PMC6836731; doi:10.1101/gr.250480.119)
Supplement: Supplemental Material [file supp_gr.250480.119_Supplemental_Table_S1JDedit.xlsx]

## Sheet: Panel B
	Supplemental Table S1: Underlying data for Figure 1B-G
	Figure 1B: Absolute quantification of D-Loop amplicons by ddPCR in a 10-fold dilution series.
	Molecules of D-Loop Amplicon Loaded in the Reaction		Molecules of D-Loop Amplicon Detected by ddPCR	Average	SD
	100000	Replicate 1	102000	101050	854.4
		Replicate 2	100000
		Replicate 3	101400
		Replicate 4	100800
	10000	Replicate 1	11800	11235	467.155
		Replicate 2	10760
		Replicate 3	11420
		Replicate 4	10960
	1000	Replicate 1	1238	1224	28.519
		Replicate 2	1220
		Replicate 3	1252
		Replicate 4	1186
	100	Replicate 1	142	130	11.7757
		Replicate 2	122
		Replicate 3	118
		Replicate 4	138
	10	Replicate 1	18	18	8.16497
		Replicate 2	18
		Replicate 3	28
		Replicate 4	8

## Sheet: Panel C
	Figure 1C: Inter-assay variability of ddMDM.
	Cell Equivalents Loaded in the Reaction	mtDNA copies per Reaction Quantified by ddMDM																Average of Averages	SD
		1st Experiment				2nd Experiment				3rd Experiment				4th Experiment
		Replicate 1	Replicate 2	Average	SD	Replicate 1	Replicate 2	Average	SD	Replicate 1	Replicate 2	Average	SD	Replicate 1	Replicate 2	Average	SD
	10	3300	3560	3430	183.848	3200	3060	3130	98.9949	3720	3180	3450	381.838	3220	3500	3360	197.99	3342.5	146.828
	5	1820	1516	1668	214.96	1720	1450	1585	190.919	1620	1740	1680	84.8528	1940	1620	1780	226.274	1678.25	79.9098
	2.5	838	832	835	4.24264	838	820	829	12.7279	904	712	808	135.765	792	884	838	65.0538	827.5	13.5277
	1.25	430	428	429	1.41421	384	366	375	12.7279	442	398	420	31.1127	408	462	435	38.1838	414.75	27.2075
	0.625	198	204	201	4.24264	212	204	208	5.65685	174	222	198	33.9411	194	242	218	33.9411	206.25	8.88351
	0.3125	74	98	86	16.9706	108	94	101	9.89949	120	96	108	16.9706	104	112	108	5.65685	100.75	10.3722
	0.15625	56	42	49	9.89949	40	36	38	2.82843	68	68	68	0	76	76	76	0	57.75	17.3662

## Sheet: Panel D
	Figure 1D: Intra-assay variability of ddMDM.
	Cell Equivalents Loaded in the Reaction	mtDNA copies per Reaction Quantified by ddMDM					Average	SD
		Replicate 1	Replicate 2	Replicate 3	Replicate 4	Replicate 5
	10	3176	2840	3108	2990	3192	3061.2	147.035
	5	1488	1442	1452	1452	1396	1446	32.9848
	2.5	672	710	692	674	672	684	16.7929
	1.25	382	314	270	306	322	318.8	40.5364
	0.625	170	160	114	156	180	156	25.2587
	0.3125	70	58	72	84	228	102.4	70.8153

## Sheet: Panel E
	Figure 1E: Limit of detection below one cell equivalent by ddMDM.
	Cell Equivalents Loaded in the Reaction	mtDNA copies per Reaction Quantified by ddMDM						Average	SD
		Experiment 1			Experiment 2
		Replicate 1	Replicate 2	Replicate 3	Replicate 1	Replicate 2	Replicate 3
	10	23970	23900	22950	24600	24850	24850	24186.7	736.116
	1	2380	2310	2380	2350	2400	2380	2366.67	32.0416
	0.1	224	224	231	226	212	248	227.5	11.8279
	0.01	29	22	29	44	30	17.2	28.5333	9.08772
	0.001	13.4	5.4	9.7	8.8	5.6	1.4	7.38333	4.15905

## Sheet: Panel F-G
	Figure 1F-G: mtDNA copies per cells quantified by ddMDM in resting and stimulated T cells, Jurkat T leukemia cells, and a cell-free (lysis buffer) control.
	#		mtDNA copies per Cell Quantified by ddMDM		Average	SD
			Concentration (raw values)	mtDNA copies per cell
	Resting T cells	Replicate 1	465	1860	1846	65.1767
		Replicate 2	440.5	1762
		Replicate 3	460.5	1842
		Replicate 4	480	1920
	Stimulated T cells	Replicate 1	1270	5080	4870	273.983
		Replicate 2	1220	4880
		Replicate 3	1120	4480
		Replicate 4	1260	5040
	Jurkat T cells	Replicate 1	4722.5	18890	19351.2	715.453
		Replicate 2	4672.5	18690
		Replicate 3	5067.5	20270
		Replicate 4	4888.75	19555
	Cell-Free Control	Replicate 1	1.25	5	6.75	5.62702
		Replicate 2	2.05	8.2
		Replicate 3	3.4	13.6
		Replicate 4	0.05	0.2
