# Supplementary material for: Quantitative mitochondrial DNA copy number determination using droplet digital PCR with single-cell resolution
Source: Genome Res. 2019 Nov;29(11):1878–88. doi: 10.1101/gr.250480.119 (PMC6836731; doi:10.1101/gr.250480.119)
Supplement: Supplemental Material [file supp_gr.250480.119_Supplemental_Table_S3JDedit.xlsx]

## Sheet: Panel A
	Supplemental Table S3: Underlying data for Figure 3A-E
	Figure 3A: Absolute mtDNA molecules per cell measured by ddMDM in different primary and transformed cell lines
	#	mtDNA copy number per cell (ddMDM)						Average	SD
		Replicate 1	Replicate 2	Replicate 3	Replicate 4	Replicate 5	Replicate 6
	Human Resting T cells	372	352.4	368.4	384			369.2	13.0353
	Human Stimulated T cells	1016	976	896	1008			974	54.7966
	Human Late Passage BJ fibroblasts	2006	2072	2430	2486	2630		2324.8	271.91
	Human Brochiolar Epitelial Cells (HBEC)	2640	2420	2928	2668	2508	2536	2616.67	177.258
	Jurkat T cells	3780	3740	4056				3858.67	172.062
	Human Retina Pigment Epithelial Cells (RPE)	5600	4112	5216				4976	772.487
	293T	8424	6780	7140				7448	864.194
	H1299	9608	8112	9020				8913.33	753.683

## Sheet: Panel B
	Figure 3B: Absolute mtDNA molecules per cell measured by ddMDM in primary HBECs at the indicated population doublings (PD).
	#	mtDNA copy number per cell (ddMDM)			Average	SD
		Replicate 1	Replicate 2	Replicate 3
	PD15	2668	2508	2536	2570.67	85.4478
	PD24	3700	3452	3332	3494.67	187.673
	PD39	5780	5916	5813	5836.33	70.9389

## Sheet: Panel C
	Figure 3C: Absolute mtDNA molecules per cell measured by ddMDM in human colonic epithelial cell (HCEC) cancer progression series.
	#	mtDNA copy number per cell (ddMDM)			Average	SD
		Replicate 1	Replicate 2	Replicate 3
	CT	3140	3060	2860	3020	144.222
	CTP	2290	2840	2140	2423.33	368.556
	CTR	2210	2050	2560	2273.33	260.832
	CTRPA	2360	2450	2650	2486.67	148.436
	CTRPM	1880	2280	2060	2073.33	200.333

## Sheet: Panel D-E
	Figure 3D-E: Comparison of mtDNA molecules per cell measured by ddMDM in both single H1299 cells and pooled H1299 cells
	#	mtDNA copy number per cell (ddMDM)						mtDNA copy number per cell (ddMDM)	Average	SD
		Single Cell Values (Average of 3 Replicates)	SD (3 Replicates)	Average (73 Single Cells)	SD (73 Single Cells)
	Single Cell 1	1146.67	56.1902	8875.52	4482.91		Pooled Control 1	9080	8942.36	892.601
	Single Cell 2	1170.67	52.0513				Pooled Control 2	9600
	Single Cell 3	2326.67	480.555				Pooled Control 3	8400
	Single Cell 4	2740	148.922				Pooled Control 4	8560
	Single Cell 5	2792	44.5421				Pooled Control 5	9300
	Single Cell 6	3640	260				Pooled Control 6	9000
	Single Cell 7	3706.67	23.094				Pooled Control 7	11180
	Single Cell 8	4226.67	144.684				Pooled Control 8	10620
	Single Cell 9	4306.67	181.475				Pooled Control 9	9680
	Single Cell 10	4413.33	469.184				Pooled Control 10	9940
	Single Cell 11	4573.33	189.54				Pooled Control 11	8720
	Single Cell 12	4593.33	488.399				Pooled Control 12	8500
	Single Cell 13	4697.78	83.3556				Pooled Control 13	7720
	Single Cell 14	4954.67	308.216				Pooled Control 14	8040
	Single Cell 15	5106.67	52.915				Pooled Control 15	7500
	Single Cell 16	5220	100				Pooled Control 16	8180
	Single Cell 17	5346.67	101.614				Pooled Control 17	9860
	Single Cell 18	5554.67	189.709				Pooled Control 18	9320
	Single Cell 19	5578.67	225.471				Pooled Control 19	8980
	Single Cell 20	5581.33	260.01				Pooled Control 20	8120
	Single Cell 21	5626.67	351.188				Pooled Control 21	8240
	Single Cell 22	5630	61.2826				Pooled Control 22	8840
	Single Cell 23	5660	687.895				Pooled Control 23	8965
	Single Cell 24	5713.33	626.844				Pooled Control 24	7855
	Single Cell 25	6033.33	402.658				Pooled Control 25	9359
	Single Cell 26	6504	313.841
	Single Cell 27	6726.67	1153.14
	Single Cell 28	6955.56	252.396
	Single Cell 29	7341.33	849.671
	Single Cell 30	7486.67	488.399
	Single Cell 31	7560	277
	Single Cell 32	7920	423.32
	Single Cell 33	7946.67	323.316
	Single Cell 34	8160	211.66
	Single Cell 35	8493.33	560.833
	Single Cell 36	8506.67	567.568
	Single Cell 37	8593.33	457.092
	Single Cell 38	8600	188.562
	Single Cell 39	8613.33	257.164
	Single Cell 40	8666.67	94.2809
	Single Cell 41	8700	235.702
	Single Cell 42	8773.33	230.94
	Single Cell 43	8853.33	46.188
	Single Cell 44	8888.89	234.126
	Single Cell 45	9226.67	520.513
	Single Cell 46	9586.67	816.415
	Single Cell 47	9733.33	333.067
	Single Cell 48	9786.67	743.326
	Single Cell 49	10000	654.828
	Single Cell 50	10173.3	499.733
	Single Cell 51	10186.7	508.068
	Single Cell 52	10266.7	188.562
	Single Cell 53	10440	1739
	Single Cell 54	10666.7	482.217
	Single Cell 55	11173.3	698.952
	Single Cell 56	11333.3	257.164
	Single Cell 57	11533.3	377.124
	Single Cell 58	11566.7	2015.18
	Single Cell 59	11653.3	166.533
	Single Cell 60	12673.3	722
	Single Cell 61	13700	2663.33
	Single Cell 62	14461.1	1020.94
	Single Cell 63	14488.9	907.581
	Single Cell 64	14633.3	329.983
	Single Cell 65	14693.3	201.329
	Single Cell 66	15100	1220.98
	Single Cell 67	15222.2	977
	Single Cell 68	16766.7	1084.23
	Single Cell 69	17573.3	760.351
	Single Cell 70	18777.8	252.396
	Single Cell 71	18933.3	768.722
	Single Cell 72	19066.7	743.326
	Single Cell 73	20866.7	188.562
