# Supplementary material for: Quantitative mitochondrial DNA copy number determination using droplet digital PCR with single-cell resolution
Source: Genome Res. 2019 Nov;29(11):1878–88. doi: 10.1101/gr.250480.119 (PMC6836731; doi:10.1101/gr.250480.119)
Supplement: Supplemental Material [file supp_gr.250480.119_Supplemental_Table_S4JDedit.xlsx]

## Sheet: Panel A
	Supplemental Table S4: Underlying data for Figure 4A-D
	Figure 4A: Absolute mtDNA molecules per cell measured by ddMDM in T cells from 22 healthy donors (aged 33 ± 7). T cells were stimulated at day 0 and mtDNA was measured over a 15-day period of stimulation.
	#	Age	mtDNA copy number per cell
			Day 0	Day 1	Day 2	Day 3	Day 4	Day 5	Day 6	Day 7	Day 8	Day 9	Day 10	Day 11	Day 12	Day 13	Day 14	Day 15
	Subject 1	37		232	364	896	1720	1228	944	692			936
	Subject 2	39		211.2	296	1120	1324	1260	1008	652			684
	Subject 3	38		187.6	222	580	1000	1360	1228	880			808
	Subject 4	35		272.8	372	932	1808	1024	900	728			396
	Subject 5	46			404	988	1484	1160	960	908			564
	Subject 6	42		321.2	338	1048	1460	1248	1012	764			712
	Subject 7	31		282	596	1288	1328	796	1088	620			788
	Subject 8	38		217.6	444	1200	1228	1472	1016	1088			576
	Subject 9	32		325.6	556	1324	1276	1124	732	492			584
	Subject 10	51		214.8	480	1172	1732	1552	1632	704			624
	Subject 11	29		209.2	432	1004	1280	1540	868	564			452
	Subject 12	31		228.8	516	1092	1820	1276	1268	1268			744
	Subject 13	32	437.454	379.009	1020.14	1262.77	1687.83	1636.47	1694.91	743.849	416.201	370.153	332.961	390.4	443.2	470.4	408	574.4
	Subject 14	28	402.033	293.997	577.368	1799.41	1392.06	936.895	1041.39	556.116	414.43	435.683	375.467	273.6	353.6	388.8	292.8	361.6
	Subject 15	30	428.599	279.829	742.078	1450.51	1052.01	1275.17	1879.1	726.138	618.103	529.55	389.635	584	300.8	334.4	377.6	385.6
	Subject 16	29	435.683	453.394	662.38	1400.92	1717.94	995.341	1241.52	557.887	623.416	510.068	513.61	433.6	352	459.2	316.8	494.4
	Subject 17	33	444.538	430.37	820.005	1262.77	954.606	835.944	770.415	611.019	370.153	340.045	465.791	313.6	308.8	302.4	376	331.2
	Subject 18	25	389.635	295.768	587.995	2089.86	1500.1	1034.3	1004.2	793.439	510.068	380.78	435.683	422.4	379.2	558.4	651.2	387.2
	Subject 19	23	506.526	423.285	687.175	1046.7	1106.92	974.088	603.934	423.285	476.418	557.887	373.696
	Subject 20	28	492.357	455.165	791.668	1044.93	827.089	784.583	494.128	464.02	458.707	364.84	478.189	404.8	409.6	382.4	345.6	336
	Subject 21	28	386.093	297.54	584.453	1207.87	1216.72	1408	1119.32	876.679	653.524	458.707	464.02	403.2	473.6	342.4	395.2	440
	Subject 22	26	332.4	241.6	624	1016	1240	924	972	584	324.4	332.8	396
	Average	33.2273	425.532	297.75	550.784	1192.08	1370.69	1174.76	1067.13	713.474	486.542	428.051	549.684	403.2	377.6	404.8	395.4	413.8
	SD	6.96202	51.3281	84.9969	191.177	311.624	289.857	253.491	333.279	202.054	113.206	82.5188	167.187	91.7856	61.4224	85.3138	110.499	84.5817

## Sheet: Panel B
	Figure 4B: Absolute mtDNA molecules per cell measured by ddMDM in T cells from 22 healthy young (aged 33 ± 7), 22 healthy old (aged 73 ± 6), 7 healthy centenarian (aged 104 ± 4), and 10 frail centenarians (aged 104 ± 3). T cells were stimulated at day 0 and mtDNA was measured over a 10-day period of stimulation and the highest point that mtDNA reached for each individual was designated as the "pe…
		mtDNA copies x cell (Day 0)						mtDNA copies x cell (Peak)						mtDNA copies x cell (Day 10)
		Young	Old	Healthy Centenarians	Frail Centenarians			Young	Old	Healthy Centenarians	Frail Centenarians			Young	Old	Healthy Centenarians	Frail Centenarians
			214.4	608	168			1694.91	1084	1424	1124			936	384	352	333.6
			976	306.4	528			1799.41	652	884	976			684			378.8
			174.4	284.8				1879.1	592	1092	540			808	384	261.6
			1856	1064	804			1717.94	760	1168	1012			396		612
			340		476			1262.77	576	940	792			564		752
			540	532	132.8			2089.86	272.4	1256	1080			712		580	110
			254.4	344	648			1106.92	708	1620	688			788		432
			388		1048			1044.93	381.6		796			576
								1408	712		972			584	1056		884
			1068					1240	1020		968			624	724		824
			196.8					1720	1148					452
			568					1324	448					744
		437.454	582.4					1360	516					332.961	436
		402.033						1808	1024					375.467	748
		428.599	452					1484	1020					389.635
		435.683	1608					1460	880					513.61	444
		444.538	956					1328	748					465.791	836
		389.635	772					1472	1312					435.683	227.2
		506.526	460					1324	1088					373.696
		492.357						1732	416					478.189
		386.093	428					1540	812					464.02
		332.4						1820	1624					396	648
	Average	425.532	657.467	523.2	543.543		Average	1527.99	808.818	1197.71	894.8		Average	549.684	588.72	498.267	506.08
	SD	51.3281	475.968	295.189	328.576		SD	272.41	332.303	261.349	184.83		SD	167.187	255.053	182.095	334.188

## Sheet: Panel C-D
	Figure 4C-D: MT-ND4 and D-Loop molecules were measured by ddMDM from T cells to show the prevalence of mutated mtDNA (carrying the 4977bp common deletion) to total mtDNA.
		Young		Old		Healthy Centenarians		Frail Centenarians
		% of Common Deletion	Age	% of Common Deletion	Age	% of Common Deletion	Age	% of Common Deletion	Age
		14.9	32	1	65	6.6	105	20.2	105
		10.4	37	9.5	72	11.5	113	15.7	105
		1.9	39	17.5	79	13.3	104	13.5	105
		9.3	28	23.2	72	14.7	102	20.5	106
		9.1	38	12.6	63	13.9	101	19.8	101
		11.1	26	21	81	13.6	102	19.6	106
		6.2	30	2.7	71	0	99	13.2	105
		11.9	35	29	65			14	105
		4.7	46	14.1	61			16.7	100
		17.2	42	17.8	75			17.7	100
		9.8	29	0	73
		18.4	33	8.2	72
		11	31	13.5	83
		5.1	25	16.8	75
		0	38	20.4	80
		7.7	23	21.2	77
		0	32	15.2	79
		11.9	51	15.2	80
		5.2	28	16.7	74
		10.1	28	14.6	70
		5.9	29	20.9	67
		17.9	31	20.1	64
	Average	9.07727	33.2273	15.0545	72.6364	10.5143	103.714	17.09	103.8
	SD	5.24776	6.96202	7.25605	6.40346	5.37135	4.53557	2.88615	2.4404
