# Supplementary material for: Quantitative mitochondrial DNA copy number determination using droplet digital PCR with single-cell resolution
Source: HighWire-hosted journal article supplement (doi:10.1101/gr.250480.119), 2019-09-23
Supplement: Supplemental_Fig_S2.pdf.pdf [file Supplemental_Fig_S2.pdf.pdf]

# Supplemental Figure 2

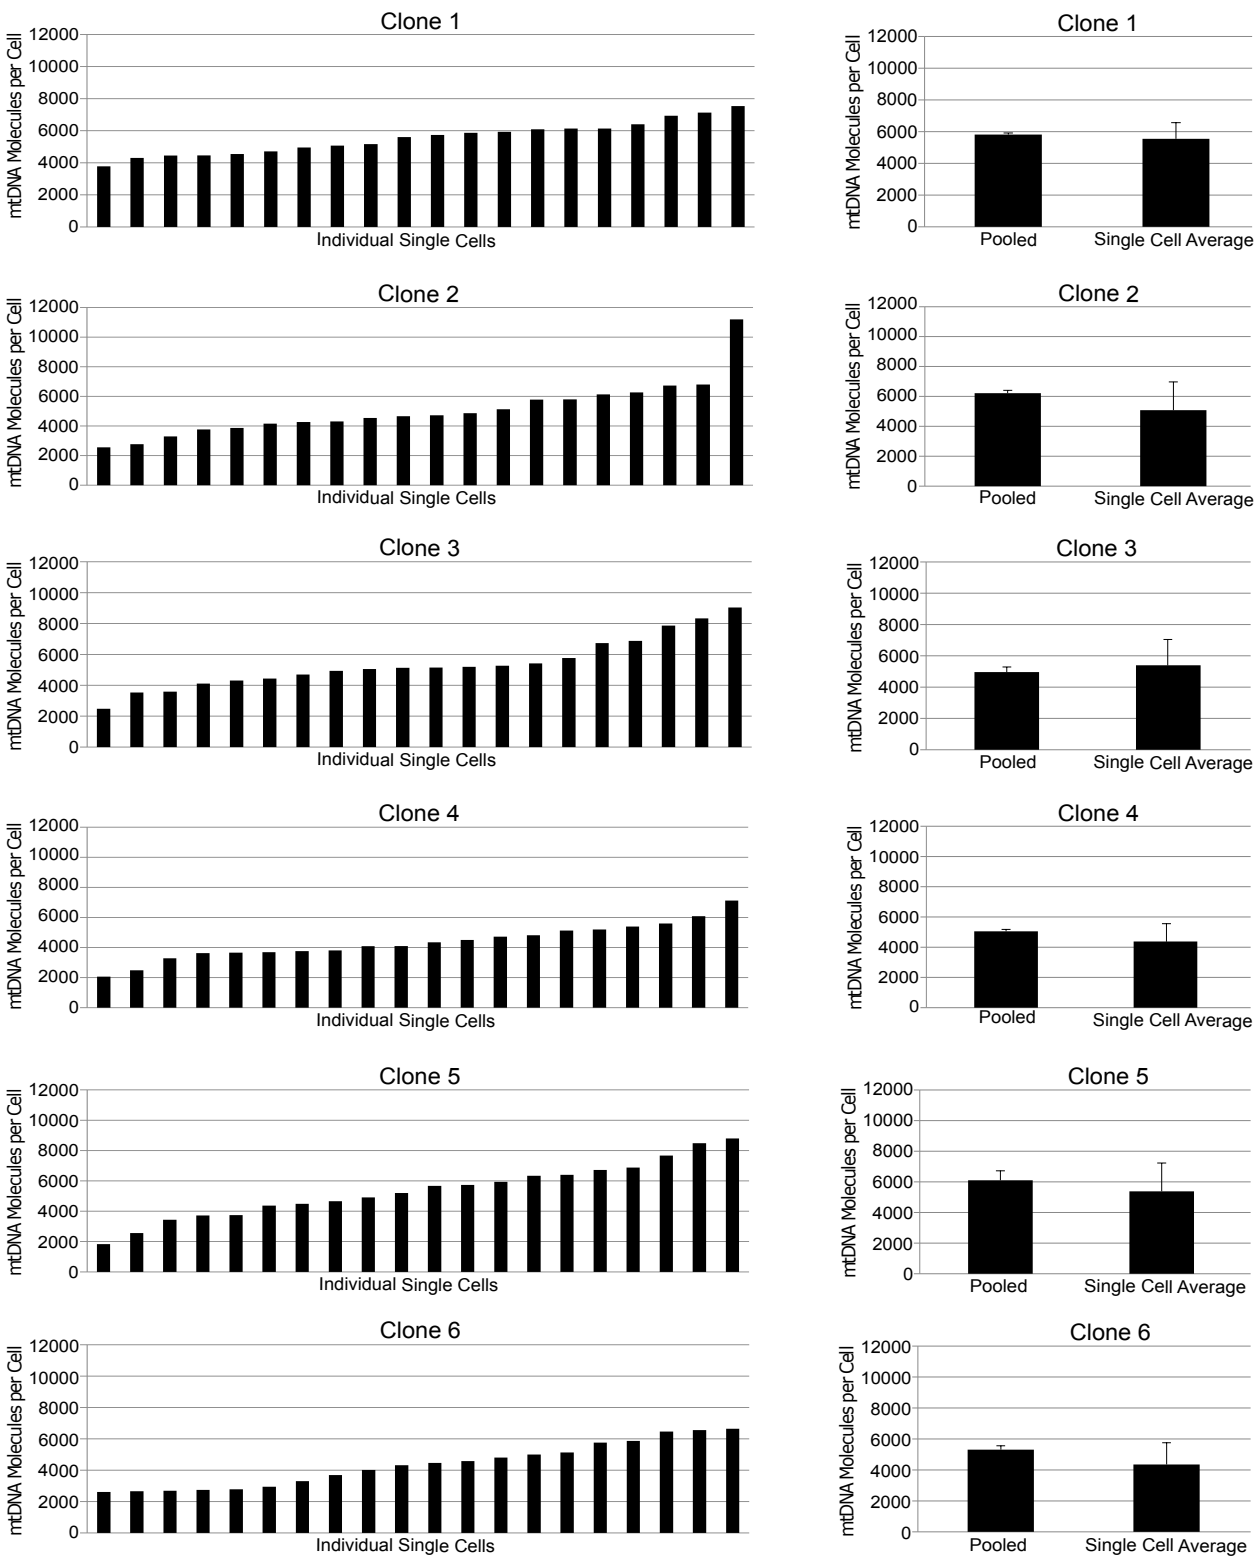

## Supplemental Figure 2

ddMDM quantification of mtDNA copy number in H1299 single cells from different clones and comparisons between averages of H1299 pooled controls and averages of H1299 single cells.
